# Supplementary material for: Spectral tuning of the n-UV convertible oxynitride phosphor: orange color emitting realization via an energy transfer mechanism
Source: Royal Society of Chemistry journal article supplement (doi:10.1039/c3cp51854j), 2013-01-01
Supplement: c3cp51854j.pdf [file c3cp51854j.pdf]

## **Supporting information**

### **Spectral Tuning of the n-UV convertible Oxynitride Phosphor: Orange Color Emitting**

#### **Realization via energy transfer mechanism**

Yongchao Jia,<sup>a,b</sup> Wei Lü,<sup>a</sup> Ning Guo,<sup>a,b</sup> Wenzhen Lü,<sup>a,b</sup> Qi Zhao,<sup>a,b</sup> and Hongpeng You<sup>a,\*</sup>

<sup>a</sup>State key Laboratory of Rare Earth Resource Utilization, Changchun Institute of Applied Chemistry, Chinese Academy of Sciences, Changchun 130022, P. R. China.

<sup>b</sup>Graduate University of the Chinese Academy of Sciences, Beijing 100049, P. R. China.

\*Corresponding author: E-mail address: [hpyou@ciac.jl.cn](mailto:hpyou@ciac.jl.cn)

## Experimental Section

### Synthesis and Characterization

Powder samples of YASON:Ce<sup>3+</sup>,Tb<sup>3+</sup>,Eu<sup>3+</sup> were prepared by solid-state reaction starting from high purity Y<sub>2</sub>O<sub>3</sub>, Eu<sub>2</sub>O<sub>3</sub>, Tb<sub>4</sub>O<sub>7</sub>, CeO<sub>2</sub>, Al<sub>2</sub>O<sub>3</sub>, and  $\alpha$ -Si<sub>3</sub>N<sub>4</sub>. The powder reagents were intimately ground together with ethanol in an agate mortar, placed in high purity Al<sub>2</sub>O<sub>3</sub> crucibles, and heated at 1550 ~ 1650°C in a 10%/H<sub>2</sub>-/90%N<sub>2</sub> atmosphere for 6h. Finally, the obtained samples were cooled to room temperature and ground again in an agate mortar. Powder XRD data were obtained using Cu-K radiation (Bruker D8) over the angular range 10°≤2θ≤80° with a step size 0.02°. Photoluminescence (PL) spectra were measured on a Hitachi F-4500 luminescence spectrophotometer scanning the wavelength range of 200-700nm. The diffuse-reflectance spectra were obtained by a SHIMADZU UV-vis-NIR spectrophotometer with the reflection of black felt (reflection 3%) and white BaSO<sub>4</sub> (reflection 100%) in the wavelength region of 300-800 nm. The luminescent decay curve was obtained from a Lecroy Wave Runner 6100 Digital Oscilloscope (1GHz) using a tunable laser (pulse width = 4ns, gate = 50ns) as the excitation source (Continuum Sunlite OPO). The temperature-dependence properties of the phosphors were measured by an FLS-920 combined fluorescence lifetime and steady state spectrometer (Edinburgh Instruments), and the excitation sources used include a 450W xenon lamp.

## Results and Discussion

### Phase formation

Figure S1 shows the X-ray diffraction pattern of the synthesized sample YASON:Ce<sup>3+</sup>,Tb<sup>3+</sup>,Eu<sup>3+</sup>.

All the diffraction peaks of obtained samples can be indexed to the standard data of Y<sub>10</sub>Al<sub>2</sub>Si<sub>3</sub>O<sub>18</sub>N<sub>4</sub> with JCPDS file no 32-1426 except for some shift toward smaller angle, indicating that the obtained samples are single phase and doped activators, (Ce<sup>3+</sup>, Tb<sup>3+</sup>, Eu<sup>3+</sup> ions) have been incorporated in the host lattice by replacing the Y<sup>3+</sup> crystallographic sites due to their similar physical character.<sup>1</sup>

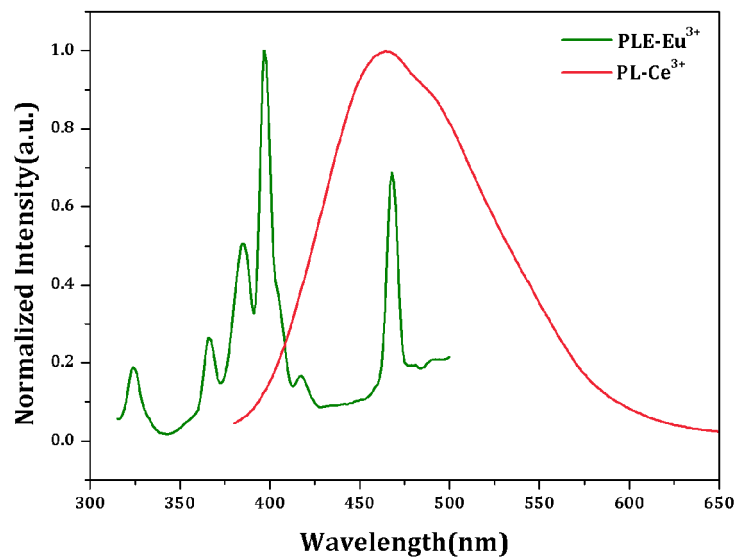

**Figure S1.** The overlap spectra between the PLE-YASON:0.05Eu<sup>3+</sup> and PL- YASON:0.05Ce<sup>3+</sup> samples.

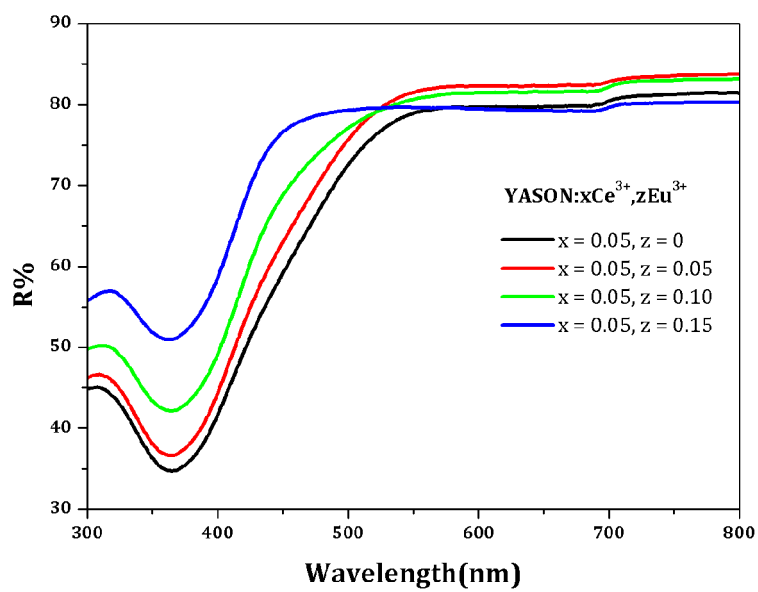

**Figure S2.** Diffuse reflection spectra of YASON:xCe<sup>3+</sup>,zEu<sup>3+</sup> (x = 0.05; z = 0, 0.05, 0.10, 0.15).

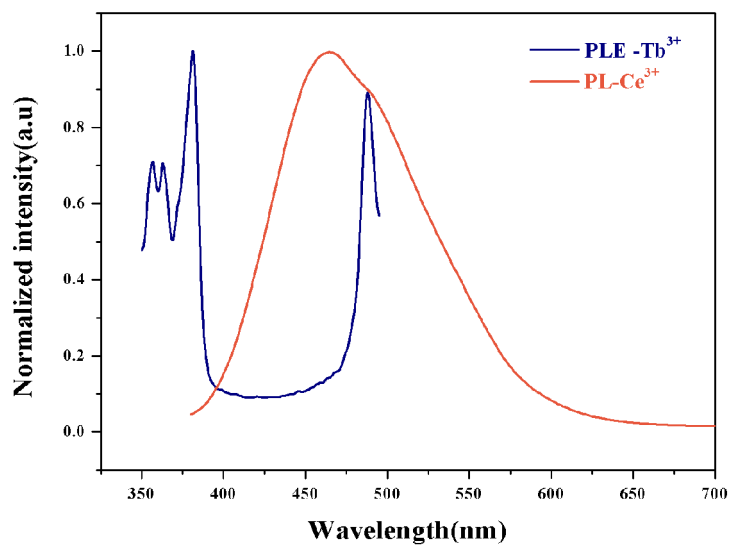

**Figure S3.** The overlap spectra between the PLE-YASON:0.05Tb<sup>3+</sup> and PL- YASON:0.05Ce<sup>3+</sup> samples.

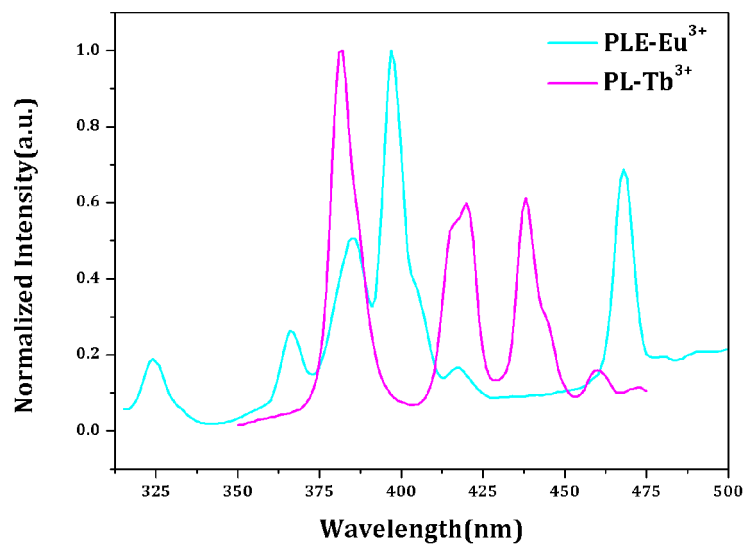

**Figure S4.** The overlap spectra between the PLE-YASON:0.05Eu<sup>3+</sup> and PL- YASON:0.05Tb<sup>3+</sup> samples.

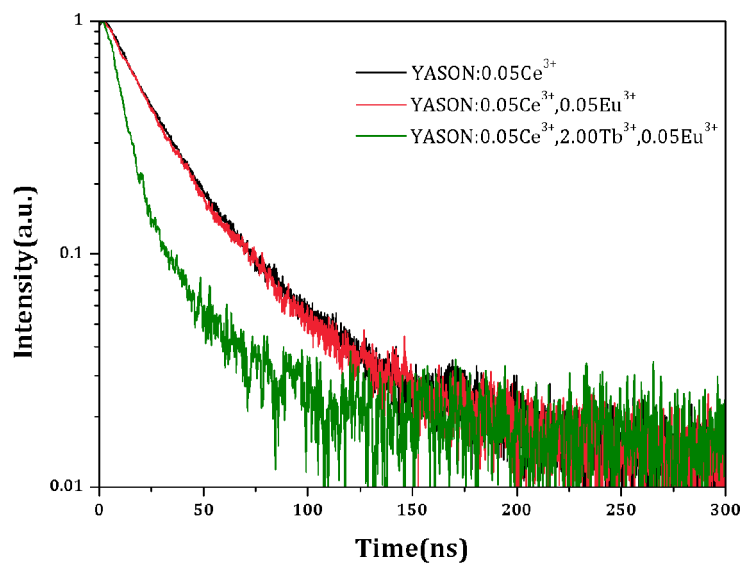

**Figure S5.** Decay curves of Ce<sup>3+</sup> ions in YASON:0.05Ce<sup>3+</sup>; YASON:0.05Ce<sup>3+</sup>,0.05Eu<sup>3+</sup>;  
YASON:0.05Ce<sup>3+</sup>,2.00Tb<sup>3+</sup>,0.05Eu<sup>3+</sup> sample. (excited at 355 nm, monitored at 460 nm.)



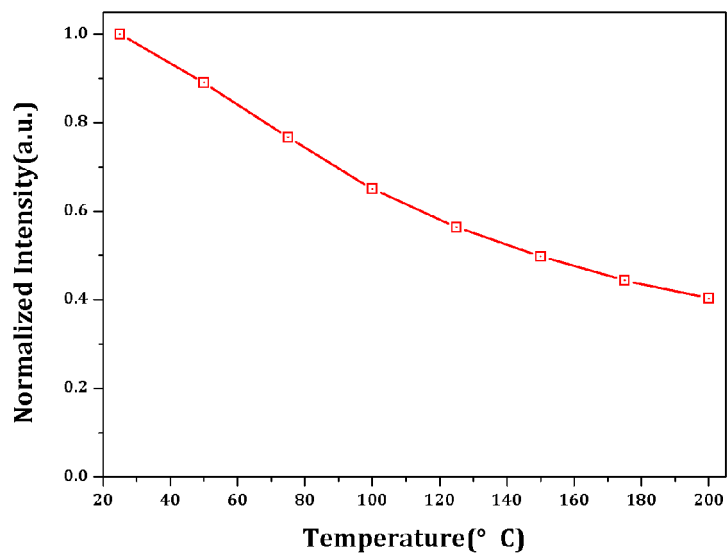

**Figure S6.** Temperature dependence of the emission intensities of YASON: 0.05Ce<sup>3+</sup>, 2.00Tb<sup>3+</sup>, 0.05Eu<sup>3+</sup> phosphor between 25°C and 200°C.

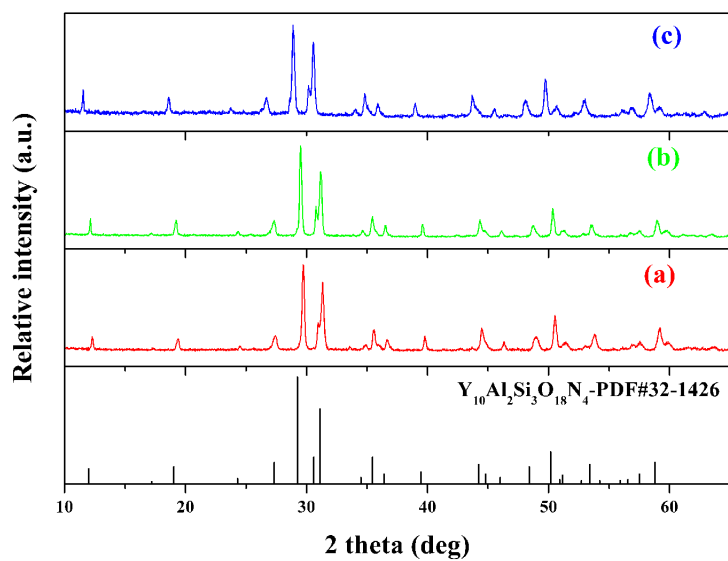

**Figure S7.** XRD profiles for the typical phosphors in the conditions of (a) YASON:0.05Ce<sup>3+</sup>; (b) YASON:0.05Ce<sup>3+</sup>,0.20Tb<sup>3+</sup>; (c) YASON:0.05Ce<sup>3+</sup>,2.00Tb<sup>3+</sup>,0.05Eu<sup>3+</sup>. The standard data of YASON (JCPDS card No. 32-1426) is shown as reference.

## Reference

1. R. D. Shannon, *Acta Crystallogr. Sect. A* 1976, 32, 751.
